# Supplementary material for: One-pot synthesis of blue light-emitting Au nanoclusters and formation of photo-patternable composite films
Source: Royal Society of Chemistry journal article supplement (doi:10.1039/c0cc03539d), 2010-11-26
Supplement: c0cc03539d.pdf [file c0cc03539d.pdf]

## Supporting information S1

### Experimental:

Mass spectrum of Au NC was measured by using MALDI-TOF MS, Applied Biosystems, Voyager System 4379, USA operated by N<sub>2</sub> laser (337nm, 20.0Hz, acceleration voltage=20kV) in the linear configuration. Single drop (aprox. 1μL) of methanol solution of 2,5-dihydroxybenzoic acid were dropped onto the sample plate, and then, dried at room temperature. One microlitter of toluene solution of Au NC and PB-NH<sub>2</sub> was also dropped over the matrix region, and dried. After dry, mass spectrum was measured by using the positive mode of mass spectroscopy. In the case of 2-(4-hydroxyphenylazo)benzoic acid (HABA) matrix, a toluene solution of Au NC and **1** and the methanol solution of HABA were mixed, and then, the mixed solution was also dropped on a sample plate and the mass spectrometry was performed according to the above mentioned procedures.

### Result:

(i) MALDI-TOF MS spectrum of Au NC (matrix: 2,5-dihydroxybenzoic acid)

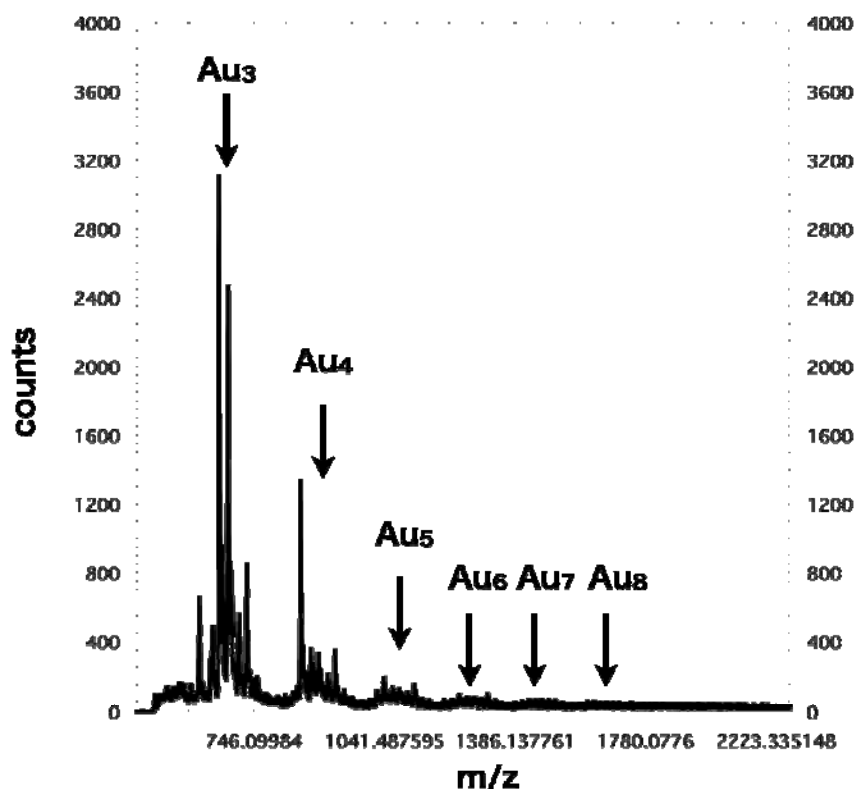

Multiples peaks attributed to the fragmentation of Au nanoclusters were observed. The maximum mass was observed at 1600 m/z. Atomic weight of Au is 196.96, thus, molecular weight of Au<sub>8</sub> cluster is 1575.68. there are intermitted broad peaks exist every 200 m/z, these are considered as fragmented Au nanoclusters shown in the plot. Broadning of mass spectrum was occurred due to ionization of Au clusters with other atoms including chlorine. This result suggest that formation of Au

nanoclusters.

(ii) MALDI-TOF MS spectrum of Au NC (matrix: HABA)

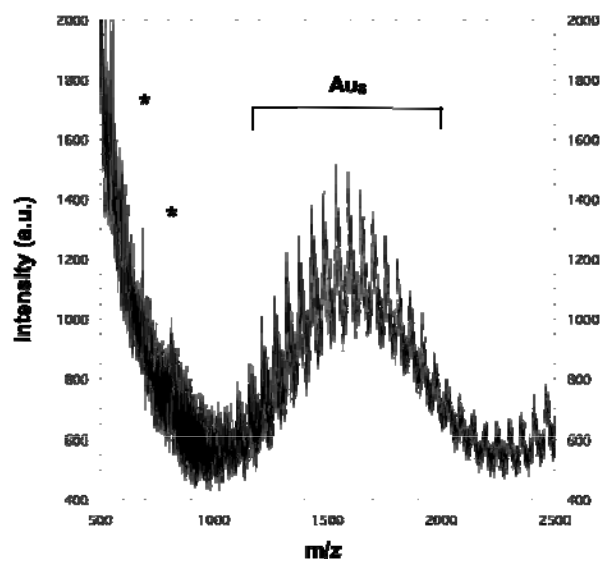

More detail spectrum of Au<sub>8</sub> cluster was obtained when HABA was used as a matrix. Clear peaks around 1580 m/z are identical to the Au<sub>8</sub> clusters. The \* marks indicate the dimer and trimer of HABA.

## Supporting information S2

### Emission and excitation spectra of Au NC with 2

*Result:*

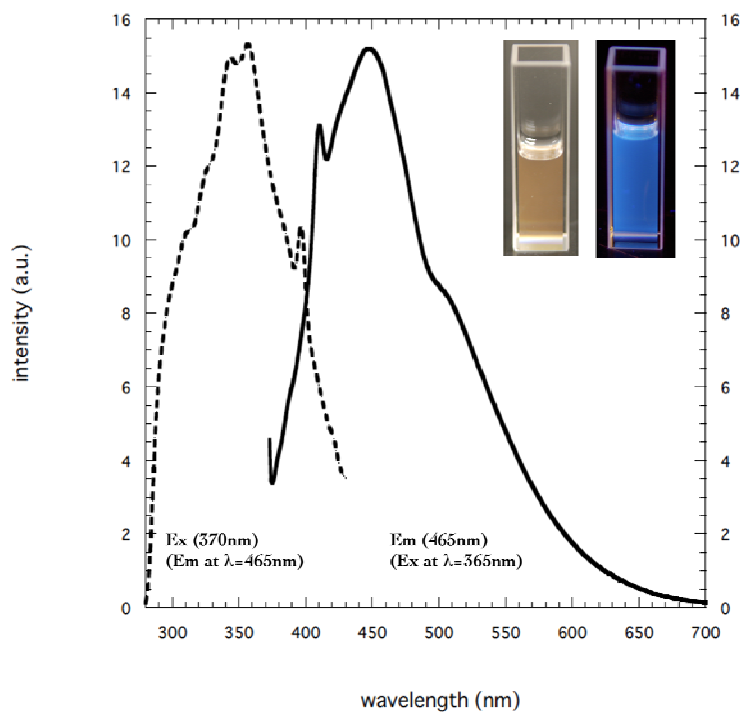

Basically same emission and excitation peaks from Au NC were observed at  $\lambda=465\text{nm}$  and  $370\text{nm}$ , respectively. The inset photographs show the toluene solutions of Au NCs under visible light (left) and UV light ( $\lambda=365\text{nm}$ ), respectively.
